# Supplementary material
Source: ML conference proceedings conference paper supplement (https://openaccess.thecvf.com/content/ICCV2025/html/Wu_A_Conditional_Probability_ICCV_2025_paper.html)
Supplement: Supplementary file 1 [file Wu_A_Conditional_Probability_ICCV_2025_supplemental.pdf]

# A Conditional Probability Framework for Compositional Zero-shot Learning

## Supplementary Materials

Peng Wu<sup>1\*</sup>, Qiuxia Lai<sup>2\*</sup>, Hao Fang<sup>1</sup>, Guo-Sen Xie<sup>3</sup>, Yilong Yin<sup>1</sup>, Xiankai Lu<sup>1†</sup>, Wenguan Wang<sup>4,5</sup>

<sup>1</sup>Shandong University, <sup>2</sup>Communication University of China, <sup>3</sup>Nanjing University of Science and Technology,

<sup>4</sup>Zhejiang University, <sup>5</sup>National Key Laboratory of Human-Machine Hybrid Augmented Intelligence, Xi'an Jiaotong University

<https://github.com/Pieux0/CPF>

This document offers theoretical justification and implementation of CPF, pseudo-code of CPF, additional experimental results, further qualitative analysis, comprehensive implementation details and extensive dataset information. The structure is organized as follows:

- §1 Theoretical justification and implementation of CPF
- §2 Pseudo-code of CPF
- §3 More experimental results
- §4 More qualitative analysis
- §5 More implementation details
- §6 Summary of data split statistics

## 1. Theoretical Justification and Implementation of CPF

The chain rule of probability universally decomposes any joint probability into a product of conditional and marginal probabilities [3]:  $p(a, o|x) = p(a|o, x)p(o|x)$  (or symmetrically  $p(a, o|x) = p(o|a, x)p(a|x)$ ). In CZSL, the choice to decompose  $p(a, o|x)$  as  $p(a|o, x)p(o|x)$  (rather than  $p(a|x)p(o|x)$  or  $p(o|a, x)p(a|x)$ ) is driven by semantic and contextual dependencies: (i) the independence assumption  $p(a)p(o)$  fails to capture semantic binding [4, 10], whereas the conditional probability explicitly models plausible attribute-object relationships. (ii) The semantic asymmetry (established empirically by Nagarajan and Grauman [9]) structurally favors  $p(a|o, x)$  over  $p(o|a, x)$ , as objects act as semantic anchors that causally determine plausible attributes, whereas the inverse mapping  $p(o|a, x)$  is ill-posed due to attribute-sharing across objects, violating injectivity for stable inference. In practical, we adopt the additive formulation to address the practical issue of “probability vanishing” inherent in multiplicative approaches.

## 2. Pseudo-code of CPF

Algorithm 1 provides the pseudo-code of CPF.

\*Equal Contribution.

†Corresponding author: Xiankai Lu.

---

### Algorithm 1 Pseudo-code of CPF in a PyTorch-like style.

---

```
"""
# v_h_c: deep-level class feature (1 x D)
# V_h_p: deep-level patch feature (HW x D)
# v_l_c: shallow-level class feature (1 x D)
# V_l_p: shallow-level patch feature (HW x D)
# W_a: attribute textual embedding (M x D)
# W_o: object textual embedding (N x D)
# W_f_o: projection matrix (D x d)
# W_f_a: projection matrix (D x d)
# D: visual feature dimension
# d: textual embedding dimension
"""

##### text-enhanced object learning #####
# projecting deep-level class feature into the
# joint semantic space
v_h_c_d = v_h_c @ W_f_o
# compute similarity score
score_1 = torch.matmul(v_h_c_d, W_o.transpose()) /
          torch.sqrt(torch.tensor(d))
# compute q_t with similarity score
q_t = F.softmax(score_1, dim=-1) @ W_o
# projecting deep-level patch feature into the
# joint semantic space
V_h_p_d = V_h_p @ W_f_o
# compute attention score
score_2 = torch.matmul(q_t, V_h_p_d.transpose()) /
          torch.sqrt(torch.tensor(d))
# compute object feature
v_o = v_h_c + F.softmax(score_2, dim=-1) @ V_h_p

##### object-guided attribute learning #####
# compute attention score
score_3 = torch.matmul(v_o, V_l_p.transpose()) /
          torch.sqrt(torch.tensor(D))
# compute attribute feature
v_a = F.softmax(score_3, dim=-1) @ V_l_p
```

---

## 3. More Experiment Results

In this section, we present the ablation study on loss weight coefficients  $\alpha_1$  and  $\alpha_2$  on UT-Zappos50K [12]. The results are shown in Table 1. Additionally, we conduct ablation experiments on block choices on UT-Zappos50K [12] to select the most suitable blocks as shallow-level visual embeddings. The corresponding results are presented in Table 2. Moreover, as shown in the Table 3, our CLIP-based CPF consistently outperforms other methods on MiT-States and UT-Zappos50K.

Table 1. Ablation study on loss weight coefficients  $\alpha_1$  and  $\alpha_2$  on UT-Zappos50K [12].

| $\alpha_1$ | $\alpha_2$ | UT-Zappos50K   |               |                 |                   |
|------------|------------|----------------|---------------|-----------------|-------------------|
|            |            | AUC $\uparrow$ | HM $\uparrow$ | Seen $\uparrow$ | Unseen $\uparrow$ |
| 0.0        | 0.0        | 28.5           | 45.1          | 56.4            | 60.9              |
| 0.3        | 0.7        | 39.2           | 53.3          | 65.3            | 71.3              |
| 0.4        | 0.6        | 39.3           | 53.4          | 64.3            | <b>72.5</b>       |
| 0.5        | 0.5        | 40.1           | 55.3          | 65.6            | 69.4              |
| 0.6        | 0.4        | <b>41.4</b>    | <b>55.7</b>   | <b>66.4</b>     | 71.1              |
| 0.7        | 0.3        | 40.0           | 54.5          | 66.0            | 69.3              |

Table 2. Ablation study on block choices on UT-Zappos50K [12].

| Setting            | Blocks  | UT-Zappos50K   |               |                 |                   |
|--------------------|---------|----------------|---------------|-----------------|-------------------|
|                    |         | AUC $\uparrow$ | HM $\uparrow$ | Seen $\uparrow$ | Unseen $\uparrow$ |
| <i>Close World</i> | (1,4,7) | 38.3           | 52.4          | 65.5            | 71.1              |
|                    | (2,5,8) | 39.2           | 53.6          | 65.3            | <b>71.7</b>       |
|                    | (3,6,9) | <b>41.4</b>    | <b>55.7</b>   | <b>66.4</b>     | 71.1              |
| <i>Open World</i>  | (1,4,7) | 28.8           | 45.6          | 64.1            | 52.3              |
|                    | (2,5,8) | 29.0           | 46.2          | <b>65.3</b>     | 51.0              |
|                    | (3,6,9) | <b>31.2</b>    | <b>47.6</b>   | 64.6            | <b>56.1</b>       |

Table 3. Results of CLIP-based CPF on MiT-States [6] and UT-Zappos50KK [12].

| Method       | UT-Zappos50K   |               | MiT-States     |               |
|--------------|----------------|---------------|----------------|---------------|
|              | AUC $\uparrow$ | HM $\uparrow$ | AUC $\uparrow$ | HM $\uparrow$ |
| CDS-CZSL [7] | 39.5           | 52.7          | 22.4           | 39.2          |
| Troika [5]   | 41.7           | 54.6          | 22.1           | 39.3          |
| PLID [1]     | 38.7           | 52.4          | 22.1           | 39.0          |
| CAILA [13]   | 44.1           | 57.0          | 23.4           | 39.9          |
| Ours         | <b>45.2</b>    | <b>57.6</b>   | <u>23.2</u>    | <b>40.5</b>   |

## 4. More Qualitative Analysis

We provide more qualitative results of UT-Zappos50K [12], MIT-States [6] and C-GQA [8] under *CW* and *OW* settings in Fig. 5. We show results for each dataset in each row. Images predicted under the *CW* setting are shown in the first three columns and the rest of the columns show the instances under the *OW* setting. In Fig. 1, we provide attention visualization for Eq. 2 and Eq. 4. In Fig. 2, we illustrate qualitative results of image retrieval. In Fig. 3, we show additional wrong predictions of instances in C-GQA [8].

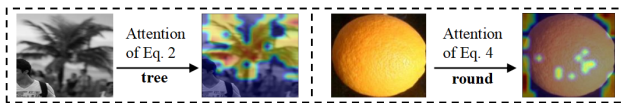

Figure 1. Attention visualizations for Eq. 2 and Eq. 4

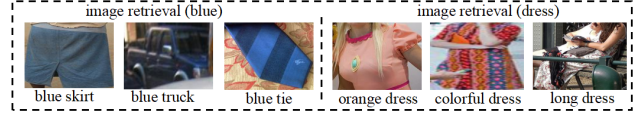

Figure 2. Qualitative results of image retrieval

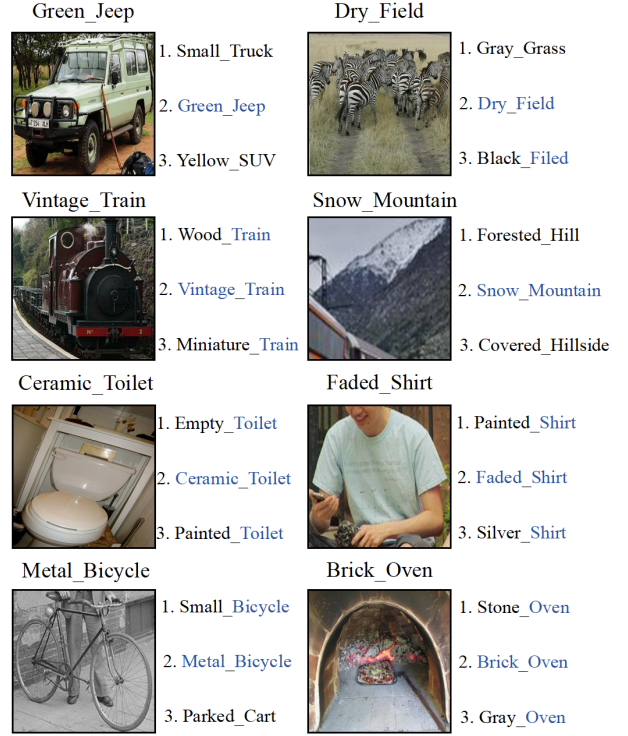

Figure 3. More qualitative results of wrong predictions of instances in C-GQA [8].

## 5. More Implementations Details

We provide the implementation details of deep-level and shallow-level feature extraction in Fig. 4.

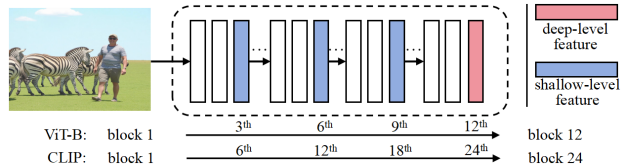

Figure 4. Implementation details of deep-level and shallow-level visual embeddings for both ViT-B and CLIP.

## 6. Summary of Data Split Statistics

Following previous work [2, 11], we provide the summary of data split statistics for UT-Zappos50K [12], MIT-States [6] and C-GQA [8] in Table 4.  $|\mathcal{A}|$  and  $|\mathcal{O}|$  represent the numbers of attribute and object classes, respectively.  $|\mathcal{C}_s|$  and

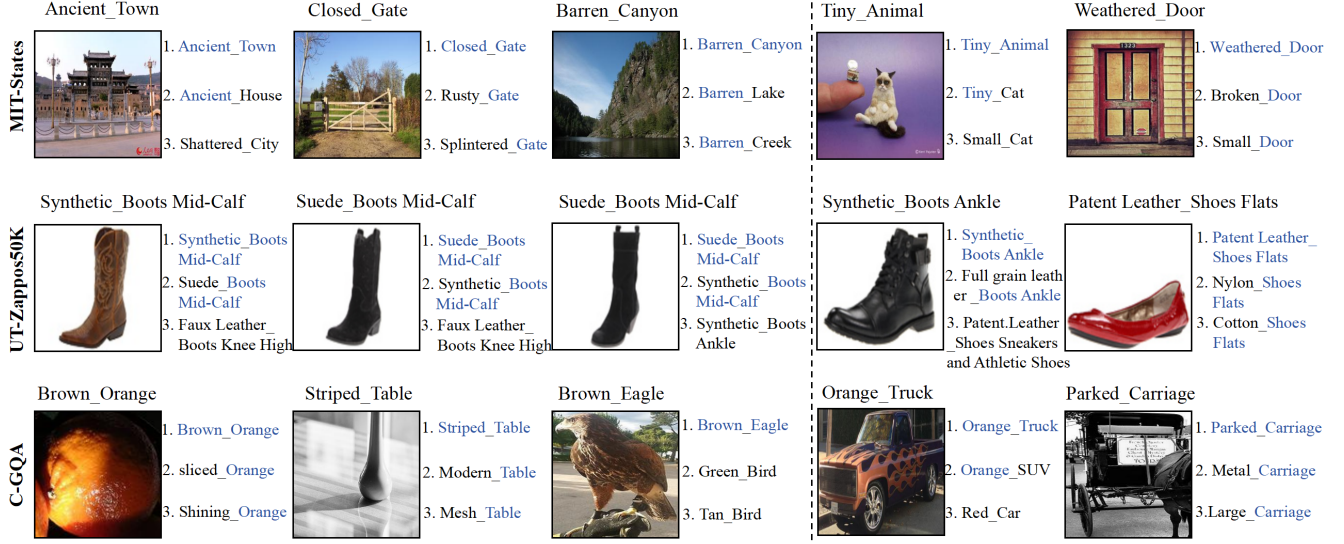

Figure 5. More qualitative results of UT-Zappos50K [12], MIT-States [6] and C-GQA [8].

Table 4. Summary of data split statistics.

| Datasets     | Composition     |                 |                                      | Train             |                 | Val                                 |                 | Test                                |                 |
|--------------|-----------------|-----------------|--------------------------------------|-------------------|-----------------|-------------------------------------|-----------------|-------------------------------------|-----------------|
|              | $ \mathcal{A} $ | $ \mathcal{O} $ | $ \mathcal{A}  \times  \mathcal{O} $ | $ \mathcal{C}_s $ | $ \mathcal{X} $ | $ \mathcal{C}_s  /  \mathcal{C}_u $ | $ \mathcal{X} $ | $ \mathcal{C}_s  /  \mathcal{C}_u $ | $ \mathcal{X} $ |
| UT-Zappos50K | 16              | 12              | 192                                  | 83                | 22998           | 15 / 15                             | 3214            | 18 / 18                             | 2914            |
| MIT-States   | 115             | 245             | 28175                                | 1262              | 30338           | 300 / 300                           | 10420           | 400 / 400                           | 12995           |
| C-GQA        | 413             | 674             | 278362                               | 5592              | 26920           | 1252 / 1040                         | 7280            | 888 / 923                           | 5098            |

$|\mathcal{C}_u|$  denote the numbers of seen and unseen composition categories, respectively.  $|\mathcal{X}|$  indicates the numbers of images.

## References

- [1] Wentao Bao, Lichang Chen, Heng Huang, and Yu Kong. Prompting language-informed distribution for compositional zero-shot learning. In *ECCV*, 2024. [2](#)
- [2] Shaozhe Hao, Kai Han, and Kwan-Yee K Wong. Learning attention as disentangler for compositional zero-shot learning. In *CVPR*, 2023. [2](#)
- [3] Jonathan Ho, Ajay Jain, and Pieter Abbeel. Denoising diffusion probabilistic models. *NeurIPS*, 2020. [1](#)
- [4] Taihang Hu, Linxuan Li, Joost van de Weijer, Hongcheng Gao, Fahad Shahbaz Khan, Jian Yang, Ming-Ming Cheng, Kai Wang, and Yaxing Wang. Token merging for training-free semantic binding in text-to-image synthesis. *NeurIPS*, 2024. [1](#)
- [5] Siteng Huang, Biao Gong, Yutong Feng, Min Zhang, Yiliang Lv, and Donglin Wang. Troika: Multi-path cross-modal traction for compositional zero-shot learning. In *CVPR*, 2024. [2](#)
- [6] Phillip Isola, Joseph J Lim, and Edward H Adelson. Discovering states and transformations in image collections. In *CVPR*, 2015. [2](#), [3](#)
- [7] Yun Li, Zhe Liu, Hang Chen, and Lina Yao. Context-based and diversity-driven specificity in compositional zero-shot learning. *CVPR*, 2024. [2](#)
- [8] Muhammad Ferjad Naeem, Yongqin Xian, Federico Tombari, and Zeynep Akata. Learning graph embeddings for compositional zero-shot learning. In *CVPR*, 2021. [2](#), [3](#)
- [9] Tushar Nagarajan and Kristen Grauman. Attributes as operators: factorizing unseen attribute-object compositions. In *ECCV*, 2018. [1](#)
- [10] Royi Rassin, Eran Hirsch, Daniel Glickman, Shauli Ravfogel, Yoav Goldberg, and Gal Chechik. Linguistic binding in diffusion models: Enhancing attribute correspondence through attention map alignment. *NeurIPS*, 2023. [1](#)
- [11] Qingsheng Wang, Lingqiao Liu, Chenchen Jing, Hao Chen, Guoqiang Liang, Peng Wang, and Chunhua Shen. Learning conditional attributes for compositional zero-shot learning. In *CVPR*, 2023. [2](#)
- [12] Aron Yu and Kristen Grauman. Fine-grained visual comparisons with local learning. In *CVPR*, 2014. [1](#), [2](#), [3](#)
- [13] Zhaoheng Zheng, Haidong Zhu, and Ram Nevatia. Caila: Concept-aware intra-layer adapters for compositional zero-shot learning. In *WACV*, 2024. [2](#)
